# Supplementary material for: Biomarkers associated with cell-in-cell structure in kidney renal clear cell carcinoma based on transcriptome sequencing
Source: PeerJ. 2025 Apr 16;13:e19246. doi: 10.7717/peerj.19246 (PMC12009028; doi:10.7717/peerj.19246)
Supplement: Supplemental Information 2 [file peerj-13-19246-s002.xls]

## Sheet: Sheet1
ITEM TO CHECK	IMPORTANCE	CHECKLIST
EXPERIMENTAL DESIGN
Definition of experimental and control groups	E	Page5-6 Line148-150
Number within each group	E	Page5-6 Line148-150
Assay carried out by core lab or investigator's lab?	D	Not Applicable
Acknowledgement of authors' contributions	D	Not Applicable
SAMPLE
Description	E	Page5-6 Line148-150
Volume/mass of sample processed	D	Not Applicable
Microdissection or macrodissection	E	Page6 Line161-176
Processing procedure	E	Page5-6 Line147-160
If frozen - how and how quickly?	E	Page5-6 Line147-160
If fixed - with what, how quickly?	E	Page5-6 Line147-160
Sample storage conditions and duration (especially for FFPE samples)	E	Page5-6 Line147-160
NUCLEIC ACID EXTRACTION
Procedure and/or instrumentation	E	Page6-7 Line177-188
Name of kit and details of any modifications	E	Page6-7 Line177-188
Source of additional reagents used	D	Not Applicable
Details of DNase or RNAse treatment	E	Page6-7 Line177-188
Contamination assessment (DNA or RNA)	E	Page6-7 Line177-188
Nucleic acid quantification	E	Page6-7 Line177-188
Instrument and method	E	Page6-7 Line177-188
Purity (A260/A280)	D	Not Applicable
Yield	D	Not Applicable
RNA integrity method/instrument	E	Page6-7 Line177-188
RIN/RQI or Cq of 3' and 5' transcripts	E	Page6-7 Line177-188
Electrophoresis traces	D	Not Applicable
Inhibition testing (Cq dilutions, spike or other)	E	Page6-7 Line177-188
REVERSE TRANSCRIPTION
Complete reaction conditions	E	Page6-7 Line177-188
Amount of RNA and reaction volume	E	Page6-7 Line177-188
Priming oligonucleotide (if using GSP) and concentration	E	Page6-7 Line177-188
Reverse transcriptase and concentration	E	Page6-7 Line177-188
Temperature and time	E	Page6-7 Line177-188
Manufacturer of reagents and catalogue numbers	D	Not Applicable
Cqs with and without RT	D*	Not Applicable
Storage conditions of cDNA	D	Not Applicable
qPCR TARGET INFORMATION
If multiplex, efficiency and LOD of each assay.	E	Page6-7 Line177-188
Sequence accession number	E	Page6-7 Line177-188
Location of amplicon	D	Not Applicable
Amplicon length	E	Page6-7 Line177-188
In silico specificity screen (BLAST, etc)	E	Page6-7 Line177-188
Pseudogenes, retropseudogenes or other homologs?	D	Not Applicable
Sequence alignment	D	Not Applicable
Secondary structure analysis of amplicon	D	Not Applicable
Location of each primer by exon or intron (if applicable)	E	Page6-7 Line177-188
What splice variants are targeted?	E	Page6-7 Line177-188
qPCR OLIGONUCLEOTIDES
Primer sequences	E	Page6-7 Line177-188
RTPrimerDB Identification Number	D	Not Applicable
Probe sequences	D**	Not Applicable
Location and identity of any modifications	E	Page6-7 Line177-188
Manufacturer of oligonucleotides	D	Not Applicable
Purification method	D	Not Applicable
qPCR PROTOCOL
Complete reaction conditions	E	Page6-7 Line177-188
Reaction volume and amount of cDNA/DNA	E	Page6-7 Line177-188
Primer, (probe), Mg++ and dNTP concentrations	E	Page6-7 Line177-188
Polymerase identity and concentration	E	Page6-7 Line177-188
Buffer/kit identity and manufacturer	E	Page6-7 Line177-188
Exact chemical constitution of the buffer	D	Not Applicable
Additives (SYBR Green I, DMSO, etc.)	E	Page6-7 Line177-188
Manufacturer of plates/tubes and catalog number	D	Not Applicable
Complete thermocycling parameters	E	Page6-7 Line177-188
Reaction setup (manual/robotic)	D	Not Applicable
Manufacturer of qPCR instrument	E	Page6-7 Line177-188
qPCR VALIDATION
Evidence of optimisation (from gradients)	D	Not Applicable
Specificity (gel, sequence, melt, or digest)	E	Page6-7 Line177-188
For SYBR Green I, Cq of the NTC	E	Page6-7 Line177-188
Standard curves with slope and y-intercept	E	Page6-7 Line177-188
PCR efficiency calculated from slope	E	Page6-7 Line177-188
Confidence interval for PCR efficiency or standard error	D	Not Applicable
r2 of standard curve	E	Page6-7 Line177-188
Linear dynamic range	E	Page6-7 Line177-188
Cq variation at lower limit	E	Page6-7 Line177-188
Confidence intervals throughout range	D	Not Applicable
Evidence for limit of detection	E	Page6-7 Line177-188
If multiplex, efficiency and LOD of each assay.	E	Page6-7 Line177-188
DATA ANALYSIS
qPCR analysis program (source, version)	E	Page6-7 Line177-188
Cq method determination	E	Page6-7 Line177-188
Outlier identification and disposition	E	Page6-7 Line177-188
Results of NTCs	E	Page6-7 Line177-188
Justification of number and choice of reference genes	E	Page6-7 Line177-188
Description of normalisation method	E	Page6-7 Line177-188
Number and concordance of biological replicates	D	Not Applicable
Number and stage (RT or qPCR) of technical replicates	E	Page6-7 Line177-188
Repeatability (intra-assay variation)	E	Page6-7 Line177-188
Reproducibility (inter-assay variation, %CV)	D	Not Applicable
Power analysis	D	Not Applicable
Statistical methods for result significance	E	Page6-7 Line177-188
Software (source, version)	E	Page6-7 Line177-188
Cq or raw data submission using RDML	D	Not Applicable
Table 1. MIQE checklist for authors, reviewers and editors. All essential information (E) must be submitted with the manuscript. Desirable
information (D) should be submitted if available. If using primers obtained from RTPrimerDB, information on qPCR target, oligonucleotides,
protocols and validation is available from that source.
*: Assessing the absence of DNA using a no RT assay is essential when first extracting RNA. Once the sample has been validated as
RDNA-free, inclusion of a no-RT control is desirable, but no longer essential.
**: Disclosure of the probe sequence is highly desirable and strongly encouraged. However, since not all commercial pre-designed assay
vendors provide this information, it cannot be an essential requirement. Use of such assays is advised against.
